# Supplementary material for: Conspecific alarm calls prevent the attenuation of neophobia behavior in wild-caught house sparrows (Passer domesticus)
Source: Frontiers journal article supplement (doi:10.3389/fbirs.2024.1440063), 2024-07-30
Supplement: Table_1.XLSX [file Table_1.XLSX]

## Sheet: Sheet1
HOSP_ID	Sex	Approach_time_s	Feed_time_s	Object	Trial_number	Trial_number_restart	Trial_Date	Status_Approach	Status_Feed	Treatment	Room	Week	Treatment_Week	Treatment_Number_Combined	Treatment_Week_Combined
210	M	783	784	Cover	1	1	2022-05-30	1	1	Alarm	667	1	Alarm1	1	Alarm1
210	M	129	130	Control	2	2	5/31/2022	1	1	Alarm	667	1	Alarm1	1	Alarm1
210	M	368	369	Control	3	3	2022-06-01	1	1	Alarm	667	1	Alarm1	1	Alarm1
210	M	2318	2320	Red dish	4	4	2022-06-02	1	1	Alarm	667	1	Alarm1	1	Alarm1
210	M	3600	3600	Glow stick	5	5	2022-06-03	0	0	Alarm	667	1	Alarm1	1	Alarm1
215	F	3600	3600	Felt star	1	1	2022-05-30	0	0	Alarm	667	1	Alarm1	1	Alarm1
215	F	2258.72	2258.72	Purple egg	2	2	2022-05-31	1	1	Alarm	667	1	Alarm1	1	Alarm1
215	F	589.348	591.847	Control	3	3	2022-06-01	1	1	Alarm	667	1	Alarm1	1	Alarm1
215	F	31.634	33.635	Control	4	4	2022-06-02	1	1	Alarm	667	1	Alarm1	1	Alarm1
215	F	3600	3600	Foam fan	5	5	2022-06-03	0	0	Alarm	667	1	Alarm1	1	Alarm1
216	F	554	558	Felt star	1	1	2022-05-30	1	1	Alarm	667	1	Alarm1	1	Alarm1
216	F	3002	3003	Purple egg	2	2	2022-05-31	1	1	Alarm	667	1	Alarm1	1	Alarm1
216	F	305	305	Control	3	3	2022-06-01	1	1	Alarm	667	1	Alarm1	1	Alarm1
216	F	14	19	Control	4	4	2022-06-02	1	1	Alarm	667	1	Alarm1	1	Alarm1
216	F	170	171	Jinglebells	5	5	2022-06-03	1	1	Alarm	667	1	Alarm1	1	Alarm1
218	M	689	959	Foam fan	1	1	2022-05-30	1	1	Alarm	667	1	Alarm1	1	Alarm1
218	M	246	248	Control	2	2	2022-05-31	1	1	Alarm	667	1	Alarm1	1	Alarm1
218	M	657	663	Control	3	3	2022-06-01	1	1	Alarm	667	1	Alarm1	1	Alarm1
218	M	183	203	Control	4	4	2022-06-02	1	1	Alarm	667	1	Alarm1	1	Alarm1
218	M	3291	3531	Cover	5	5	2022-06-03	1	1	Alarm	667	1	Alarm1	1	Alarm1
221	M	634	635	Cover	1	1	2022-05-30	1	1	Alarm	667	1	Alarm1	1	Alarm1
221	M	96	100	Control	2	2	2022-05-31	1	1	Alarm	667	1	Alarm1	1	Alarm1
221	M	274	275	Pipe cleaner	3	3	2022-06-01	1	1	Alarm	667	1	Alarm1	1	Alarm1
221	M	53	53	Glow stick	4	4	2022-06-02	1	1	Alarm	667	1	Alarm1	1	Alarm1
222	M	578	584	Control	1	1	2022-05-30	1	1	Alarm	667	1	Alarm1	1	Alarm1
222	M	941	945	Pipe cleaner	2	2	2022-05-31	1	1	Alarm	667	1	Alarm1	1	Alarm1
222	M	415	417	Control	3	3	2022-06-01	1	1	Alarm	667	1	Alarm1	1	Alarm1
222	M	1486	1774	Jinglebells	4	4	2022-06-02	1	1	Alarm	667	1	Alarm1	1	Alarm1
222	M	1536	1536	Red dish	5	5	2022-06-03	1	1	Alarm	667	1	Alarm1	1	Alarm1
223	M	3600	3600	Foam fan	1	1	2022-05-30	0	0	Alarm	667	1	Alarm1	1	Alarm1
223	M	349	353	Pink puffs	2	2	2022-05-31	1	1	Alarm	667	1	Alarm1	1	Alarm1
223	M	555	635	Glow stick	3	3	2022-06-01	1	1	Alarm	667	1	Alarm1	1	Alarm1
223	M	20	44	Control	4	4	2022-06-02	1	1	Alarm	667	1	Alarm1	1	Alarm1
223	M	309	311	Control	5	5	2022-06-03	1	1	Alarm	667	1	Alarm1	1	Alarm1
225	M	17	194	Control	1	1	2022-05-30	1	1	Alarm	667	1	Alarm1	1	Alarm1
225	M	369	370	Glow stick	2	2	2022-05-31	1	1	Alarm	667	1	Alarm1	1	Alarm1
225	M	3600	3600	Jinglebells	3	3	2022-06-01	0	0	Alarm	667	1	Alarm1	1	Alarm1
225	M	2336	2338	Red dish	4	4	2022-06-02	1	1	Alarm	667	1	Alarm1	1	Alarm1
225	M	21	21	Control	5	5	2022-06-03	1	1	Alarm	667	1	Alarm1	1	Alarm1
227	M	3600	3600	Red dish	1	1	2022-05-30	0	0	Alarm	667	1	Alarm1	1	Alarm1
227	M	1361.98	1368.48	Glow stick	2	2	2022-05-31	1	1	Alarm	667	1	Alarm1	1	Alarm1
227	M	60.6	499.349	Control	3	3	2022-06-01	1	1	Alarm	667	1	Alarm1	1	Alarm1
227	M	1617.16	3600	Purple egg	4	4	2022-06-02	1	1	Alarm	667	1	Alarm1	1	Alarm1
227	M	9.386	361.918	Control	5	5	2022-06-03	1	1	Alarm	667	1	Alarm1	1	Alarm1
231	M	175	177	Foam fan	1	1	2022-05-30	1	1	Alarm	667	1	Alarm1	1	Alarm1
231	M	11	107	Control	2	2	2022-05-31	1	1	Alarm	667	1	Alarm1	1	Alarm1
231	M	221	256	Control	3	3	2022-06-01	1	1	Alarm	667	1	Alarm1	1	Alarm1
231	M	1025	1119	Cover	4	4	2022-06-02	1	1	Alarm	667	1	Alarm1	1	Alarm1
231	M	35	482	Pink puffs	5	5	2022-06-03	1	1	Alarm	667	1	Alarm1	1	Alarm1
233	F	3600	3600	Control	1	1	2022-05-30	0	0	Alarm	667	1	Alarm1	1	Alarm1
233	F	3600	3600	Red dish	2	2	2022-05-31	0	0	Alarm	667	1	Alarm1	1	Alarm1
233	F	3600	3600	Purple egg	3	3	2022-06-01	0	0	Alarm	667	1	Alarm1	1	Alarm1
233	F	745	745	Control	4	4	2022-06-02	1	1	Alarm	667	1	Alarm1	1	Alarm1
233	F	3600	3600	Pink puffs	5	5	2022-06-03	0	0	Alarm	667	1	Alarm1	1	Alarm1
239	F	8	600	Cover	1	1	2022-05-30	1	1	Alarm	667	1	Alarm1	1	Alarm1
239	F	11	263	Felt star	2	2	2022-05-31	1	1	Alarm	667	1	Alarm1	1	Alarm1
239	F	9	50	Glow stick	3	3	2022-06-01	1	1	Alarm	667	1	Alarm1	1	Alarm1
239	F	10	27	Control	4	4	2022-06-02	1	1	Alarm	667	1	Alarm1	1	Alarm1
239	F	16	33	Control	5	5	2022-06-03	1	1	Alarm	667	1	Alarm1	1	Alarm1
210	M	1829	1829	Control	6	1	2022-06-06	1	1	Alarm	667	2	Alarm2	1	Alarm2
210	M	1756	1757	Felt star	7	2	2022-06-07	1	1	Alarm	667	2	Alarm2	1	Alarm2
210	M	990	990	Control	8	3	2022-06-08	1	1	Alarm	667	2	Alarm2	1	Alarm2
210	M	563	565	Pipe cleaner	9	4	2022-06-09	1	1	Alarm	667	2	Alarm2	1	Alarm2
210	M	1547	1549	Jinglebells	10	5	2022-06-10	1	1	Alarm	667	2	Alarm2	1	Alarm2
215	F	3600	3600	Jinglebells	6	1	2022-06-06	0	0	Alarm	667	2	Alarm2	1	Alarm2
215	F	3600	3600	Pink puffs	7	2	2022-06-07	0	0	Alarm	667	2	Alarm2	1	Alarm2
215	F	3600	3600	Control	8	3	2022-06-08	0	0	Alarm	667	2	Alarm2	1	Alarm2
215	F	3600	3600	Control	9	4	2022-06-09	0	0	Alarm	667	2	Alarm2	1	Alarm2
215	F	3600	3600	Pipe cleaner	10	5	2022-06-10	0	0	Alarm	667	2	Alarm2	1	Alarm2
216	F	1193	1196	Pink puffs	6	1	2022-06-06	1	1	Alarm	667	2	Alarm2	1	Alarm2
216	F	129	130	Control	7	2	2022-06-07	1	1	Alarm	667	2	Alarm2	1	Alarm2
216	F	792	802	Control	8	3	2022-06-08	1	1	Alarm	667	2	Alarm2	1	Alarm2
216	F	766	768	Pipe cleaner	9	4	2022-06-09	1	1	Alarm	667	2	Alarm2	1	Alarm2
216	F	281	289	Red dish	10	5	2022-06-10	1	1	Alarm	667	2	Alarm2	1	Alarm2
218	M	3600	3600	Purple egg	6	1	2022-06-06	0	0	Alarm	667	2	Alarm2	1	Alarm2
218	M	1832	1833	Pink puffs	7	2	2022-06-07	1	1	Alarm	667	2	Alarm2	1	Alarm2
218	M	244	988	Control	8	3	2022-06-08	1	1	Alarm	667	2	Alarm2	1	Alarm2
218	M	593	611	Felt star	9	4	2022-06-09	1	1	Alarm	667	2	Alarm2	1	Alarm2
218	M	222	318	Control	10	5	2022-06-10	1	1	Alarm	667	2	Alarm2	1	Alarm2
221	M	3600	3600	Foam fan	6	1	2022-06-06	0	0	Alarm	667	2	Alarm2	1	Alarm2
221	M	186	188	Jinglebells	7	2	2022-06-07	1	1	Alarm	667	2	Alarm2	1	Alarm2
221	M	1005	1010	Purple egg	9	4	2022-06-09	1	1	Alarm	667	2	Alarm2	1	Alarm2
221	M	101	101	Control	10	5	2022-06-10	1	1	Alarm	667	2	Alarm2	1	Alarm2
222	M	1670	1681	Control	6	1	2022-06-06	1	1	Alarm	667	2	Alarm2	1	Alarm2
222	M	3600	3600	Cover	7	2	2022-06-07	0	0	Alarm	667	2	Alarm2	1	Alarm2
222	M	1117	1119	Foam fan	8	3	2022-06-08	1	1	Alarm	667	2	Alarm2	1	Alarm2
222	M	950	952	Control	9	4	2022-06-09	1	1	Alarm	667	2	Alarm2	1	Alarm2
222	M	3600	3600	Purple egg	10	5	2022-06-10	0	0	Alarm	667	2	Alarm2	1	Alarm2
223	M	1192	1229	Purple egg	6	1	2022-06-06	1	1	Alarm	667	2	Alarm2	1	Alarm2
223	M	862	862	Red dish	7	2	2022-06-07	1	1	Alarm	667	2	Alarm2	1	Alarm2
223	M	134	147	Control	8	3	2022-06-08	1	1	Alarm	667	2	Alarm2	1	Alarm2
223	M	462	463	Cover	9	4	2022-06-09	1	1	Alarm	667	2	Alarm2	1	Alarm2
223	M	73	80	Control	10	5	2022-06-10	1	1	Alarm	667	2	Alarm2	1	Alarm2
225	M	43	442	Control	6	1	2022-06-06	1	1	Alarm	667	2	Alarm2	1	Alarm2
225	M	1743	1748	Cover	7	2	2022-06-07	1	1	Alarm	667	2	Alarm2	1	Alarm2
225	M	2960	2970	Foam fan	8	3	2022-06-08	1	1	Alarm	667	2	Alarm2	1	Alarm2
225	M	90	90	Felt star	9	4	2022-06-09	1	1	Alarm	667	2	Alarm2	1	Alarm2
225	M	54	54	Control	10	5	2022-06-10	1	1	Alarm	667	2	Alarm2	1	Alarm2
227	M	1811	1812	Control	6	1	2022-06-06	1	1	Alarm	667	2	Alarm2	1	Alarm2
227	M	3600	3600	Foam fan	7	2	2022-06-07	0	0	Alarm	667	2	Alarm2	1	Alarm2
227	M	977	977	Control	8	3	2022-06-08	1	1	Alarm	667	2	Alarm2	1	Alarm2
227	M	3600	3600	Pink puffs	9	4	2022-06-09	0	0	Alarm	667	2	Alarm2	1	Alarm2
227	M	2285	2286	Felt star	10	5	2022-06-10	1	1	Alarm	667	2	Alarm2	1	Alarm2
231	M	1098	1104	Pipe cleaner	6	1	2022-06-06	1	1	Alarm	667	2	Alarm2	1	Alarm2
231	M	1657	1661	Red dish	7	2	2022-06-07	1	1	Alarm	667	2	Alarm2	1	Alarm2
231	M	214	217	Control	8	3	2022-06-08	1	1	Alarm	667	2	Alarm2	1	Alarm2
231	M	63	192	Felt star	9	4	2022-06-09	1	1	Alarm	667	2	Alarm2	1	Alarm2
231	M	90	228	Control	10	5	2022-06-10	1	1	Alarm	667	2	Alarm2	1	Alarm2
233	F	3600	3600	Pipe cleaner	6	1	2022-06-06	0	0	Alarm	667	2	Alarm2	1	Alarm2
233	F	184	186	Control	7	2	2022-06-07	1	1	Alarm	667	2	Alarm2	1	Alarm2
233	F	99	100	Control	8	3	2022-06-08	1	1	Alarm	667	2	Alarm2	1	Alarm2
233	F	3600	3600	Cover	9	4	2022-06-09	0	0	Alarm	667	2	Alarm2	1	Alarm2
233	F	53	53	Foam fan	10	5	2022-06-10	1	1	Alarm	667	2	Alarm2	1	Alarm2
239	F	45	51	Purple egg	6	1	2022-06-06	1	1	Alarm	667	2	Alarm2	1	Alarm2
239	F	42	62	Control	7	2	2022-06-07	1	1	Alarm	667	2	Alarm2	1	Alarm2
239	F	3600	3600	Foam fan	8	3	2022-06-08	0	0	Alarm	667	2	Alarm2	1	Alarm2
239	F	80	80	Control	9	4	2022-06-09	1	1	Alarm	667	2	Alarm2	1	Alarm2
239	F	42	51	Jinglebells	10	5	2022-06-10	1	1	Alarm	667	2	Alarm2	1	Alarm2
210	M	936	1055	Pink puffs	11	1	2022-06-20	1	1	Alarm	667	3	Alarm3	1	Alarm3
210	M	1267	1334	Control	12	2	2022-06-21	1	1	Alarm	667	3	Alarm3	1	Alarm3
210	M	348	348	Control	13	3	2022-06-22	1	1	Alarm	667	3	Alarm3	1	Alarm3
210	M	3600	3600	Purple egg	14	4	2022-06-23	0	0	Alarm	667	3	Alarm3	1	Alarm3
210	M	1647	2075	Foam fan	15	5	2022-06-24	1	1	Alarm	667	3	Alarm3	1	Alarm3
215	F	3600	3600	Glow stick	11	1	2022-06-20	0	0	Alarm	667	3	Alarm3	1	Alarm3
215	F	3600	3600	Red dish	12	2	2022-06-21	0	0	Alarm	667	3	Alarm3	1	Alarm3
215	F	1327	1348	Control	13	3	2022-06-22	1	1	Alarm	667	3	Alarm3	1	Alarm3
215	F	14	46	Control	14	4	2022-06-23	1	1	Alarm	667	3	Alarm3	1	Alarm3
215	F	3600	3600	Cover	15	5	2022-06-24	0	0	Alarm	667	3	Alarm3	1	Alarm3
216	F	376	474	Control	11	1	2022-06-20	1	1	Alarm	667	3	Alarm3	1	Alarm3
216	F	828	828	Glow stick	12	2	2022-06-21	1	1	Alarm	667	3	Alarm3	1	Alarm3
216	F	478	479	Control	13	3	2022-06-22	1	1	Alarm	667	3	Alarm3	1	Alarm3
216	F	402	412	Cover	14	4	2022-06-23	1	1	Alarm	667	3	Alarm3	1	Alarm3
216	F	140	156	Purple egg	15	5	2022-06-24	1	1	Alarm	667	3	Alarm3	1	Alarm3
218	M	490	493	Control	11	1	2022-06-20	1	1	Alarm	667	3	Alarm3	1	Alarm3
218	M	3600	3600	Jinglebells	12	2	2022-06-21	0	0	Alarm	667	3	Alarm3	1	Alarm3
218	M	275.148	293.995	Control	13	3	2022-06-22	1	1	Alarm	667	3	Alarm3	1	Alarm3
218	M	928	3600	Red dish	14	4	2022-06-23	0	1	Alarm	667	3	Alarm3	1	Alarm3
218	M	2353	2355	Pipe cleaner	15	5	2022-06-24	1	1	Alarm	667	3	Alarm3	1	Alarm3
221	M	448	452	Felt star	11	1	2022-06-20	1	1	Alarm	667	3	Alarm3	1	Alarm3
221	M	250	375.233	Pink puffs	12	2	6/21/2022	1	1	Alarm	667	3	Alarm3	1	Alarm3
221	M	158	158	Control	13	3	2022-06-22	1	1	Alarm	667	3	Alarm3	1	Alarm3
221	M	97	97	Control	14	4	2022-06-23	1	1	Alarm	667	3	Alarm3	1	Alarm3
221	M	77	79	Red dish	15	5	2022-06-24	1	1	Alarm	667	3	Alarm3	1	Alarm3
222	M	1920	3462	Control	11	1	2022-06-20	1	1	Alarm	667	3	Alarm3	1	Alarm3
222	M	1577.76	1580.08	Pink puffs	12	2	2022-06-21	1	1	Alarm	667	3	Alarm3	1	Alarm3
222	M	2186	2186	Control	13	3	2022-06-22	1	1	Alarm	667	3	Alarm3	1	Alarm3
222	M	1742	1742	Glow stick	14	4	2022-06-23	1	1	Alarm	667	3	Alarm3	1	Alarm3
222	M	1495	1495	Felt star	15	5	2022-06-24	1	1	Alarm	667	3	Alarm3	1	Alarm3
223	M	502	618	Felt star	11	1	2022-06-20	1	1	Alarm	667	3	Alarm3	1	Alarm3
223	M	1096	1097	Pipe cleaner	12	2	2022-06-21	1	1	Alarm	667	3	Alarm3	1	Alarm3
223	M	570	572	Jinglebells	13	3	2022-06-22	1	1	Alarm	667	3	Alarm3	1	Alarm3
223	M	101	103	Control	14	4	2022-06-23	1	1	Alarm	667	3	Alarm3	1	Alarm3
223	M	66	68	Control	15	5	2022-06-24	1	1	Alarm	667	3	Alarm3	1	Alarm3
225	M	3600	3600	Pipe cleaner	11	1	2022-06-20	0	0	Alarm	667	3	Alarm3	1	Alarm3
225	M	20	21	Control	12	2	2022-06-21	1	1	Alarm	667	3	Alarm3	1	Alarm3
225	M	2217	2217	Pink puffs	13	3	2022-06-22	1	1	Alarm	667	3	Alarm3	1	Alarm3
225	M	3600	3600	Purple egg	14	4	2022-06-23	0	0	Alarm	667	3	Alarm3	1	Alarm3
225	M	24	30	Control	15	5	2022-06-24	1	1	Alarm	667	3	Alarm3	1	Alarm3
227	M	3600	3600	Jinglebells	11	1	2022-06-20	0	0	Alarm	667	3	Alarm3	1	Alarm3
227	M	856	856	Control	12	2	2022-06-21	1	1	Alarm	667	3	Alarm3	1	Alarm3
227	M	3600	3600	Cover	13	3	2022-06-22	0	0	Alarm	667	3	Alarm3	1	Alarm3
227	M	727	728	Pipe cleaner	14	4	2022-06-23	1	1	Alarm	667	3	Alarm3	1	Alarm3
227	M	262	262	Control	15	5	2022-06-24	1	1	Alarm	667	3	Alarm3	1	Alarm3
231	M	94	733	Jinglebells	11	1	2022-06-20	1	1	Alarm	667	3	Alarm3	1	Alarm3
231	M	85	606	Control	12	2	2022-06-21	1	1	Alarm	667	3	Alarm3	1	Alarm3
231	M	354.423	361.527	Purple egg	13	3	2022-06-22	1	1	Alarm	667	3	Alarm3	1	Alarm3
231	M	62	250	Control	14	4	2022-06-23	1	1	Alarm	667	3	Alarm3	1	Alarm3
231	M	3600	3600	Glow stick	15	5	2022-06-24	0	0	Alarm	667	3	Alarm3	1	Alarm3
233	F	3600	3600	Control	11	1	2022-06-20	0	0	Alarm	667	3	Alarm3	1	Alarm3
233	F	28	32	Felt star	12	2	2022-06-21	1	1	Alarm	667	3	Alarm3	1	Alarm3
233	F	59	64	Jinglebells	13	3	2022-06-22	1	1	Alarm	667	3	Alarm3	1	Alarm3
233	F	26	35	Control	14	4	2022-06-23	1	1	Alarm	667	3	Alarm3	1	Alarm3
233	F	3600	3600	Glow stick	15	5	2022-06-24	0	0	Alarm	667	3	Alarm3	1	Alarm3
239	F	59	60	Control	11	1	2022-06-20	1	1	Alarm	667	3	Alarm3	1	Alarm3
239	F	12	38	Red dish	12	2	2022-06-21	1	1	Alarm	667	3	Alarm3	1	Alarm3
239	F	40	44	Pipe cleaner	13	3	2022-06-22	1	1	Alarm	667	3	Alarm3	1	Alarm3
239	F	10	18	Control	14	4	2022-06-23	1	1	Alarm	667	3	Alarm3	1	Alarm3
239	F	315	322	Pink puffs	15	5	2022-06-24	1	1	Alarm	667	3	Alarm3	1	Alarm3
217	M	6.204	819.129	Red dish	1	1	2022-05-30	1	1	Contact	687	1	Contact1	2	Control1
217	M	4.802	128.125	Pipe cleaner	2	2	2022-05-31	1	1	Contact	687	1	Contact1	2	Control1
217	M	3.15	13.794	Control	3	3	2022-06-01	1	1	Contact	687	1	Contact1	2	Control1
217	M	16.6	65.926	Control	4	4	2022-06-02	1	1	Contact	687	1	Contact1	2	Control1
217	M	135.425	137.224	Glow stick	5	5	2022-06-03	1	1	Contact	687	1	Contact1	2	Control1
219	F	6.371	184.889	Control	1	1	2022-05-30	1	1	Contact	687	1	Contact1	2	Control1
219	F	2.475	723.504	Jinglebells	2	2	2022-05-31	1	1	Contact	687	1	Contact1	2	Control1
219	F	16.199	16.976	Control	3	3	2022-06-01	1	1	Contact	687	1	Contact1	2	Control1
219	F	145.346	163.47	Glow stick	4	4	2022-06-02	1	1	Contact	687	1	Contact1	2	Control1
219	F	832.606	1527.81	Purple egg	5	5	2022-06-03	1	1	Contact	687	1	Contact1	2	Control1
220	M	268.181	300.158	Foam fan	1	1	2022-05-30	1	1	Contact	687	1	Contact1	2	Control1
220	M	600.579	837.592	Control	2	2	2022-05-31	1	1	Contact	687	1	Contact1	2	Control1
220	M	15.697	28.949	Control	3	3	2022-06-01	1	1	Contact	687	1	Contact1	2	Control1
220	M	440.002	441.799	Cover	4	4	2022-06-02	1	1	Contact	687	1	Contact1	2	Control1
220	M	11.02	277.596	Pipe cleaner	5	5	2022-06-03	1	1	Contact	687	1	Contact1	2	Control1
224	F	819.629	820.38	Control	1	1	2022-05-30	1	1	Contact	687	1	Contact1	2	Control1
224	F	63.705	64.954	Control	2	2	2022-05-31	1	1	Contact	687	1	Contact1	2	Control1
224	F	3600	3600	Pink puffs	3	3	2022-06-01	0	0	Contact	687	1	Contact1	2	Control1
224	F	3600	3600	Foam fan	4	4	2022-06-02	0	0	Contact	687	1	Contact1	2	Control1
224	F	3600	3600	Pipe cleaner	5	5	2022-06-03	0	0	Contact	687	1	Contact1	2	Control1
226	M	0.8	741.695	Control	1	1	2022-05-30	1	1	Contact	687	1	Contact1	2	Control1
226	M	3.075	555.155	Control	2	2	2022-05-31	1	1	Contact	687	1	Contact1	2	Control1
226	M	18.106	1309.33	Cover	3	3	2022-06-01	1	1	Contact	687	1	Contact1	2	Control1
226	M	373.255	374.956	Felt star	4	4	2022-06-02	1	1	Contact	687	1	Contact1	2	Control1
226	M	178.552	181.627	Pink puffs	5	5	2022-06-03	1	1	Contact	687	1	Contact1	2	Control1
228	M	23.026	23.801	Control	1	1	2022-05-30	1	1	Contact	687	1	Contact1	2	Control1
228	M	11.476	1274.2	Glow stick	2	2	2022-05-31	1	1	Contact	687	1	Contact1	2	Control1
228	M	25.852	28.052	Control	3	3	2022-06-01	1	1	Contact	687	1	Contact1	2	Control1
228	M	25.8	28.002	Jinglebells	4	4	2022-06-02	1	1	Contact	687	1	Contact1	2	Control1
228	M	1897.13	2396.84	Purple egg	5	5	2022-06-03	1	1	Contact	687	1	Contact1	2	Control1
229	F	1.3	3600	Cover	1	1	2022-05-30	1	0	Contact	687	1	Contact1	2	Control1
229	F	9.552	771.376	Control	2	2	2022-05-31	1	1	Contact	687	1	Contact1	2	Control1
229	F	22.277	407.457	Control	3	3	2022-06-01	1	1	Contact	687	1	Contact1	2	Control1
229	F	22.252	391.325	Felt star	4	4	2022-06-02	1	1	Contact	687	1	Contact1	2	Control1
229	F	3600	3600	Pink puffs	5	5	2022-06-03	0	0	Contact	687	1	Contact1	2	Control1
230	M	15.405	1418.17	Control	1	1	2022-05-30	1	1	Contact	687	1	Contact1	2	Control1
230	M	23.054	1154.38	Control	2	2	2022-05-31	1	1	Contact	687	1	Contact1	2	Control1
230	M	3600	3600	Pipe cleaner	3	3	2022-06-01	0	0	Contact	687	1	Contact1	2	Control1
230	M	3600	3600	Red dish	4	4	2022-06-02	0	0	Contact	687	1	Contact1	2	Control1
230	M	3373.28	3375.66	Pink puffs	5	5	2022-06-03	1	1	Contact	687	1	Contact1	2	Control1
232	M	2217.14	2217.77	Foam fan	1	1	2022-05-30	1	1	Contact	687	1	Contact1	2	Control1
232	M	12.825	550.719	Jinglebells	2	2	2022-05-31	1	1	Contact	687	1	Contact1	2	Control1
232	M	18.848	24.7	Control	3	3	2022-06-01	1	1	Contact	687	1	Contact1	2	Control1
232	M	1980.54	3600	Pipe cleaner	4	4	2022-06-02	1	0	Contact	687	1	Contact1	2	Control1
232	M	15.575	15.825	Control	5	5	2022-06-03	1	1	Contact	687	1	Contact1	2	Control1
234	M	14.696	56.843	Foam fan	1	1	2022-05-30	1	1	Contact	687	1	Contact1	2	Control1
234	M	16.119	22.37	Control	2	2	2022-05-31	1	1	Contact	687	1	Contact1	2	Control1
234	M	43.977	90.328	Pink puffs	3	3	2022-06-01	1	1	Contact	687	1	Contact1	2	Control1
234	M	16.945	25.327	Control	4	4	2022-06-02	1	1	Contact	687	1	Contact1	2	Control1
234	M	1.943	618.383	Jinglebells	5	5	2022-06-03	1	1	Contact	687	1	Contact1	2	Control1
235	F	3600	3600	Pipe cleaner	1	1	2022-05-30	0	0	Contact	687	1	Contact1	2	Control1
235	F	348.406	349.677	Control	2	2	2022-05-31	1	1	Contact	687	1	Contact1	2	Control1
235	F	3600	3600	Cover	3	3	2022-06-01	0	0	Contact	687	1	Contact1	2	Control1
235	F	3600	3600	Purple egg	4	4	2022-06-02	0	0	Contact	687	1	Contact1	2	Control1
235	F	47.13	47.559	Control	5	5	2022-06-03	1	1	Contact	687	1	Contact1	2	Control1
237	F	3600	3600	Pipe cleaner	1	1	2022-05-30	0	0	Contact	687	1	Contact1	2	Control1
237	F	1101.83	1946.26	Foam fan	2	2	2022-05-31	1	1	Contact	687	1	Contact1	2	Control1
237	F	393.025	292.775	Purple egg	3	3	2022-06-01	1	1	Contact	687	1	Contact1	2	Control1
237	F	24.023	25.647	Control	4	4	2022-06-02	1	1	Contact	687	1	Contact1	2	Control1
237	F	14.876	15.926	Control	5	5	2022-06-03	1	1	Contact	687	1	Contact1	2	Control1
217	M	653	957	Control	6	1	2022-06-06	1	1	Contact	687	2	Contact2	2	Control2
217	M	90	90	Control	7	2	2022-06-07	1	1	Contact	687	2	Contact2	2	Control2
217	M	502	1428	Purple egg	8	3	2022-06-08	1	1	Contact	687	2	Contact2	2	Control2
217	M	2	1126	Foam fan	9	4	2022-06-09	1	1	Contact	687	2	Contact2	2	Control2
217	M	3600	3600	Jinglebells	10	5	2022-06-10	0	0	Contact	687	2	Contact2	2	Control2
219	F	987	1056	Cover	6	1	2022-06-06	1	1	Contact	687	2	Contact2	2	Control2
219	F	59	115	Control	7	2	2022-06-07	1	1	Contact	687	2	Contact2	2	Control2
219	F	593	607	Red dish	8	3	2022-06-08	1	1	Contact	687	2	Contact2	2	Control2
219	F	3600	3600	Foam fan	9	4	2022-06-09	0	0	Contact	687	2	Contact2	2	Control2
219	F	34	57	Control	10	5	2022-06-10	1	1	Contact	687	2	Contact2	2	Control2
220	M	734	890	Glow stick	6	1	2022-06-06	1	1	Contact	687	2	Contact2	2	Control2
220	M	64	99	Control	7	2	2022-06-07	1	1	Contact	687	2	Contact2	2	Control2
220	M	95	158	Control	8	3	2022-06-08	1	1	Contact	687	2	Contact2	2	Control2
220	M	10	51	Felt star	9	4	2022-06-09	1	1	Contact	687	2	Contact2	2	Control2
220	M	114	233	Red dish	10	5	2022-06-10	1	1	Contact	687	2	Contact2	2	Control2
224	F	3600	3600	Red dish	6	1	2022-06-06	0	0	Contact	687	2	Contact2	2	Control2
224	F	225	227	Control	7	2	2022-06-07	1	1	Contact	687	2	Contact2	2	Control2
224	F	1013	1015	Control	8	3	2022-06-08	1	1	Contact	687	2	Contact2	2	Control2
224	F	1854	1857	Felt star	9	4	2022-06-09	1	1	Contact	687	2	Contact2	2	Control2
224	F	3600	3600	Cover	10	5	2022-06-10	0	0	Contact	687	2	Contact2	2	Control2
226	M	1514	1516	Pipe cleaner	6	1	2022-06-06	1	1	Contact	687	2	Contact2	2	Control2
226	M	105	108	Control	7	2	2022-06-07	1	1	Contact	687	2	Contact2	2	Control2
226	M	536	538	Glow stick	8	3	2022-06-08	1	1	Contact	687	2	Contact2	2	Control2
226	M	89	89	Control	9	4	2022-06-09	1	1	Contact	687	2	Contact2	2	Control2
226	M	67	78	Foam fan	10	5	2022-06-10	1	1	Contact	687	2	Contact2	2	Control2
228	M	957	963	Red dish	6	1	2022-06-06	1	1	Contact	687	2	Contact2	2	Control2
228	M	57	62	Control	7	2	2022-06-07	1	1	Contact	687	2	Contact2	2	Control2
228	M	98	102	Control	8	3	2022-06-08	1	1	Contact	687	2	Contact2	2	Control2
228	M	1887	1891	Pipe cleaner	9	4	6/9/2022	1	1	Contact	687	2	Contact2	2	Control2
228	M	165	165	Pink puffs	10	5	2022-06-10	1	1	Contact	687	2	Contact2	2	Control2
229	F	2634	2637	Control	6	1	2022-06-06	1	1	Contact	687	2	Contact2	2	Control2
229	F	7	23	Control	7	2	2022-06-07	1	1	Contact	687	2	Contact2	2	Control2
229	F	3600	3600	Foam fan	8	3	2022-06-08	0	0	Contact	687	2	Contact2	2	Control2
229	F	3600	3600	Pipe cleaner	9	4	2022-06-09	0	0	Contact	687	2	Contact2	2	Control2
229	F	1723	1726	Glow stick	10	5	2022-06-10	1	1	Contact	687	2	Contact2	2	Control2
230	M	3600	3600	Glow stick	6	1	2022-06-06	0	0	Contact	687	2	Contact2	2	Control2
230	M	1146	1146	Control	7	2	2022-06-07	1	1	Contact	687	2	Contact2	2	Control2
230	M	3600	3600	Felt star	8	3	2022-06-08	0	0	Contact	687	2	Contact2	2	Control2
230	M	3051	3051	Cover	9	4	2022-06-09	1	1	Contact	687	2	Contact2	2	Control2
230	M	384	384	Control	10	5	2022-06-10	1	1	Contact	687	2	Contact2	2	Control2
232	M	2164	2167	Cover	6	1	2022-06-06	1	1	Contact	687	2	Contact2	2	Control2
232	M	185	185	Control	7	2	2022-06-07	1	1	Contact	687	2	Contact2	2	Control2
232	M	84	85	Control	8	3	2022-06-08	1	1	Contact	687	2	Contact2	2	Control2
232	M	1442	1444	Pink puffs	9	4	2022-06-09	1	1	Contact	687	2	Contact2	2	Control2
232	M	2119	2120	Red dish	10	5	2022-06-10	1	1	Contact	687	2	Contact2	2	Control2
234	M	133	353	Control	6	1	2022-06-06	1	1	Contact	687	2	Contact2	2	Control2
234	M	572	709	Purple egg	7	2	2022-06-07	1	1	Contact	687	2	Contact2	2	Control2
234	M	132	133	Glow stick	8	3	2022-06-08	1	1	Contact	687	2	Contact2	2	Control2
234	M	8	22	Control	9	4	2022-06-09	1	1	Contact	687	2	Contact2	2	Control2
234	M	514	515	Pipe cleaner	10	5	2022-06-10	1	1	Contact	687	2	Contact2	2	Control2
235	F	1222	1222	Jinglebells	6	1	2022-06-06	1	1	Contact	687	2	Contact2	2	Control2
235	F	3600	3600	Pink puffs	7	2	2022-06-07	0	0	Contact	687	2	Contact2	2	Control2
235	F	90	118	Control	8	3	2022-06-08	1	1	Contact	687	2	Contact2	2	Control2
235	F	21	56	Control	9	4	2022-06-09	1	1	Contact	687	2	Contact2	2	Control2
235	F	93	95	Felt star	10	5	2022-06-10	1	1	Contact	687	2	Contact2	2	Control2
237	F	815	816	Glow stick	6	1	2022-06-06	1	1	Contact	687	2	Contact2	2	Control2
237	F	117	120	Felt star	7	2	2022-06-07	1	1	Contact	687	2	Contact2	2	Control2
237	F	22	26	Control	8	3	2022-06-08	1	1	Contact	687	2	Contact2	2	Control2
237	F	1561	1561	Red dish	9	4	2022-06-09	1	1	Contact	687	2	Contact2	2	Control2
237	F	34	36	Control	10	5	2022-06-10	1	1	Contact	687	2	Contact2	2	Control2
217	M	1007	1046	Pink puffs	11	1	2022-06-20	1	1	Contact	687	3	Contact3	2	Control3
217	M	98	99	Control	12	2	6/21/2022	1	1	Contact	687	3	Contact3	2	Control3
217	M	301	301	Control	13	3	2022-06-22	1	1	Contact	687	3	Contact3	2	Control3
217	M	183	183	Felt star	14	4	2022-06-23	1	1	Contact	687	3	Contact3	2	Control3
217	M	726	844	Cover	15	5	2022-06-24	1	1	Contact	687	3	Contact3	2	Control3
219	F	585.914	973.385	Pink puffs	11	1	2022-06-20	1	1	Contact	687	3	Contact3	2	Control3
219	F	24	111	Control	12	2	2022-06-21	1	1	Contact	687	3	Contact3	2	Control3
219	F	41	151	Pipe cleaner	13	3	2022-06-22	1	1	Contact	687	3	Contact3	2	Control3
219	F	253	257	Felt star	14	4	2022-06-23	1	1	Contact	687	3	Contact3	2	Control3
219	F	32	32	Control	15	5	2022-06-24	1	1	Contact	687	3	Contact3	2	Control3
220	M	44	229	Control	11	1	2022-06-20	1	1	Contact	687	3	Contact3	2	Control3
220	M	26	237	Purple egg	12	2	2022-06-21	1	1	Contact	687	3	Contact3	2	Control3
220	M	21	871	Jinglebells	13	3	2022-06-22	1	1	Contact	687	3	Contact3	2	Control3
220	M	33	34	Control	14	4	2022-06-23	1	1	Contact	687	3	Contact3	2	Control3
220	M	28	168	Pink puffs	15	5	2022-06-24	1	1	Contact	687	3	Contact3	2	Control3
224	F	3600	3600	Glow stick	11	1	2022-06-20	0	0	Contact	687	3	Contact3	2	Control3
224	F	3600	3600	Jinglebells	12	2	2022-06-21	0	0	Contact	687	3	Contact3	2	Control3
224	F	555	557	Control	13	3	2022-06-22	1	1	Contact	687	3	Contact3	2	Control3
224	F	1242	1244	Control	14	4	2022-06-23	1	1	Contact	687	3	Contact3	2	Control3
224	F	625	634	Purple egg	15	5	2022-06-24	1	1	Contact	687	3	Contact3	2	Control3
226	M	28	44	Control	11	1	2022-06-20	1	1	Contact	687	3	Contact3	2	Control3
226	M	31	35	Red dish	12	2	2022-06-21	1	1	Contact	687	3	Contact3	2	Control3
226	M	46	59	Control	13	3	2022-06-22	1	1	Contact	687	3	Contact3	2	Control3
226	M	28	140	Jinglebells	14	4	2022-06-23	1	1	Contact	687	3	Contact3	2	Control3
226	M	7	30	Purple egg	15	5	2022-06-24	1	1	Contact	687	3	Contact3	2	Control3
228	M	386	386	Felt star	11	1	2022-06-20	1	1	Contact	687	3	Contact3	2	Control3
228	M	35	35	Control	12	2	2022-06-21	1	1	Contact	687	3	Contact3	2	Control3
228	M	3131	3132	Cover	13	3	2022-06-22	1	1	Contact	687	3	Contact3	2	Control3
228	M	35	41	Control	14	4	2022-06-23	1	1	Contact	687	3	Contact3	2	Control3
228	M	2505	2507	Foam fan	15	5	2022-06-24	1	1	Contact	687	3	Contact3	2	Control3
229	F	3393	3395	Red dish	11	1	2022-06-20	1	1	Contact	687	3	Contact3	2	Control3
229	F	3600	3600	Jinglebells	12	2	2022-06-21	0	0	Contact	687	3	Contact3	2	Control3
229	F	940	948	Control	13	3	2022-06-22	1	1	Contact	687	3	Contact3	2	Control3
229	F	3600	3600	Purple egg	14	4	2022-06-23	0	0	Contact	687	3	Contact3	2	Control3
229	F	414	415	Control	15	5	2022-06-24	1	1	Contact	687	3	Contact3	2	Control3
230	M	455.48	456.41	Control	11	1	2022-06-20	1	1	Contact	687	3	Contact3	2	Control3
230	M	240	240	Control	12	2	2022-06-21	1	1	Contact	687	3	Contact3	2	Control3
230	M	1044	1044	Jinglebells	13	3	2022-06-22	1	1	Contact	687	3	Contact3	2	Control3
230	M	970	984	Purple egg	14	4	2022-06-23	1	1	Contact	687	3	Contact3	2	Control3
230	M	216	229	Foam fan	15	5	2022-06-24	1	1	Contact	687	3	Contact3	2	Control3
232	M	279	287	Felt star	11	1	2022-06-20	1	1	Contact	687	3	Contact3	2	Control3
232	M	1063	1066	Purple egg	12	2	2022-06-21	1	1	Contact	687	3	Contact3	2	Control3
232	M	109	110	Control	13	3	2022-06-22	1	1	Contact	687	3	Contact3	2	Control3
232	M	681	683	Glow stick	14	4	2022-06-23	1	1	Contact	687	3	Contact3	2	Control3
232	M	26	26	Control	15	5	2022-06-24	1	1	Contact	687	3	Contact3	2	Control3
234	M	597	600	Felt star	11	1	2022-06-20	1	1	Contact	687	3	Contact3	2	Control3
234	M	120	124	Control	12	2	2022-06-21	1	1	Contact	687	3	Contact3	2	Control3
234	M	115	154	Control	13	3	2002-06-22	1	1	Contact	687	3	Contact3	2	Control3
234	M	249	252	Cover	14	4	2022-06-23	1	1	Contact	687	3	Contact3	2	Control3
234	M	115	125	Red dish	15	5	2022-06-24	1	1	Contact	687	3	Contact3	2	Control3
235	F	3600	3600	Foam fan	11	1	2022-06-20	0	0	Contact	687	3	Contact3	2	Control3
235	F	1815	3600	Glow stick	12	2	2022-06-21	1	0	Contact	687	3	Contact3	2	Control3
235	F	2409	2411	Red dish	13	3	2022-06-22	1	1	Contact	687	3	Contact3	2	Control3
235	F	429	431	Control	14	4	2022-06-23	1	1	Contact	687	3	Contact3	2	Control3
235	F	168	172	Control	15	5	2022-06-24	1	1	Contact	687	3	Contact3	2	Control3
237	F	8.104	604.981	Cover	11	1	2022-06-20	1	1	Contact	687	3	Contact3	2	Control3
237	F	1025	1026	Pink puffs	12	2	2022-06-21	1	1	Contact	687	3	Contact3	2	Control3
237	F	710	711	Jinglebells	13	3	2022-06-22	1	1	Contact	687	3	Contact3	2	Control3
237	F	28	122	Control	14	4	2022-06-23	1	1	Contact	687	3	Contact3	2	Control3
237	F	26	27	Control	15	5	2022-06-24	1	1	Contact	687	3	Contact3	2	Control3
255	F	3600	3600	Foam fan	1	1	2023-05-22	0	0	Silent	667	1	Silent1	2	Control1
255	F	4	11	Control	2	2	2023-05-23	1	1	Silent	667	1	Silent1	2	Control1
255	F	3600	3600	Jinglebells	3	3	2023-05-24	0	0	Silent	667	1	Silent1	2	Control1
255	F	5	7	Control	4	4	2023-05-25	1	1	Silent	667	1	Silent1	2	Control1
255	F	3600	3600	Cover	5	5	2023-05-26	0	0	Silent	667	1	Silent1	2	Control1
258	F	0.1	1	Control	1	1	2023-05-22	1	1	Silent	667	1	Silent1	2	Control1
258	F	3600	3600	Cover	2	2	2023-05-23	0	0	Silent	667	1	Silent1	2	Control1
258	F	3600	3600	Purple egg	3	3	2023-05-24	0	0	Silent	667	1	Silent1	2	Control1
258	F	3600	3600	Pipe cleaner	4	4	2023-05-25	0	0	Silent	667	1	Silent1	2	Control1
258	F	0.1	0.1	Control	5	5	2023-05-26	1	1	Silent	667	1	Silent1	2	Control1
263	M	2126	2130	Red dish	1	1	2023-05-22	1	1	Silent	667	1	Silent1	2	Control1
263	M	2280	2282	Foam fan	2	2	2023-05-23	1	1	Silent	667	1	Silent1	2	Control1
263	M	184	189	Felt star	3	3	2023-05-24	1	1	Silent	667	1	Silent1	2	Control1
263	M	38	39	Control	4	4	2023-05-25	1	1	Silent	667	1	Silent1	2	Control1
263	M	0.1	0.1	Control	5	5	2023-05-26	1	1	Silent	667	1	Silent1	2	Control1
264	F	22	24	Control	1	1	2023-05-22	1	1	Silent	667	1	Silent1	2	Control1
264	F	662	2170	Cover	2	2	2023-05-23	1	1	Silent	667	1	Silent1	2	Control1
264	F	3600	3600	Foam fan	3	3	2023-05-24	0	0	Silent	667	1	Silent1	2	Control1
264	F	305	306	Control	4	4	2023-05-25	1	1	Silent	667	1	Silent1	2	Control1
264	F	3600	3600	Red dish	5	5	2023-05-26	0	0	Silent	667	1	Silent1	2	Control1
265	F	19	240	Control	1	1	2023-05-22	1	1	Silent	667	1	Silent1	2	Control1
265	F	947	949	Red dish	2	2	2023-05-23	1	1	Silent	667	1	Silent1	2	Control1
265	F	22	70	Control	3	3	2023-05-24	1	1	Silent	667	1	Silent1	2	Control1
265	F	91	92	Glow stick	4	4	2023-05-25	1	1	Silent	667	1	Silent1	2	Control1
265	F	149	392	Cover	5	5	2023-05-26	1	1	Silent	667	1	Silent1	2	Control1
266	F	20	24	Jinglebells	1	1	2023-05-22	1	1	Silent	667	1	Silent1	2	Control1
266	F	665	667	Pink puffs	2	2	2023-05-23	1	1	Silent	667	1	Silent1	2	Control1
266	F	52	65	Pipe cleaner	3	3	2023-05-24	1	1	Silent	667	1	Silent1	2	Control1
266	F	21	22	Control	4	4	2023-05-25	1	1	Silent	667	1	Silent1	2	Control1
266	F	14	16	Control	5	5	2023-05-26	1	1	Silent	667	1	Silent1	2	Control1
267	F	3540	3586	Purple egg	1	1	2023-05-22	1	1	Silent	667	1	Silent1	2	Control1
267	F	2629	2630	Pink puffs	2	2	2023-05-23	1	1	Silent	667	1	Silent1	2	Control1
267	F	357	358	Control	3	3	2023-05-24	1	1	Silent	667	1	Silent1	2	Control1
267	F	2657	2684	Foam fan	4	4	2023-05-25	1	1	Silent	667	1	Silent1	2	Control1
267	F	182	185	Control	5	5	2023-05-26	1	1	Silent	667	1	Silent1	2	Control1
268	F	503	515	Control	1	1	2023-05-22	1	1	Silent	667	1	Silent1	2	Control1
268	F	3268	3270	Pipe cleaner	2	2	2023-05-23	1	1	Silent	667	1	Silent1	2	Control1
268	F	192	196	Control	3	3	2023-05-24	1	1	Silent	667	1	Silent1	2	Control1
268	F	3600	3600	Foam fan	4	4	2023-05-25	0	0	Silent	667	1	Silent1	2	Control1
268	F	3600	3600	Red dish	5	5	2023-05-26	0	0	Silent	667	1	Silent1	2	Control1
269	F	3600	3600	Purple egg	1	1	2023-05-22	0	0	Silent	667	1	Silent1	2	Control1
269	F	0.1	0.1	Control	2	2	2023-05-23	1	1	Silent	667	1	Silent1	2	Control1
269	F	3358	3359	Jinglebells	3	3	2023-05-24	1	1	Silent	667	1	Silent1	2	Control1
269	F	2	10	Control	4	4	2023-05-25	1	1	Silent	667	1	Silent1	2	Control1
269	F	3600	3600	Pipe cleaner	5	5	2023-05-26	0	0	Silent	667	1	Silent1	2	Control1
270	M	3600	3600	Purple egg	1	1	2023-05-22	0	0	Silent	667	1	Silent1	2	Control1
270	M	649	650	Control	2	2	2023-05-23	1	1	Silent	667	1	Silent1	2	Control1
270	M	1187	1188	Cover	3	3	2023-05-24	1	1	Silent	667	1	Silent1	2	Control1
270	M	384	385	Control	4	4	2023-05-25	1	1	Silent	667	1	Silent1	2	Control1
270	M	3600	3600	Pink puffs	5	5	2023-05-26	0	0	Silent	667	1	Silent1	2	Control1
272	F	1581	1638	Control	1	1	2023-05-22	1	1	Silent	667	1	Silent1	2	Control1
272	F	3600	3600	Purple egg	2	2	2023-05-23	0	0	Silent	667	1	Silent1	2	Control1
272	F	2108	2110	Red dish	3	3	2023-05-24	1	1	Silent	667	1	Silent1	2	Control1
272	F	1007	1026	Cover	4	4	2023-05-25	1	1	Silent	667	1	Silent1	2	Control1
272	F	262	265	Control	5	5	2023-05-26	1	1	Silent	667	1	Silent1	2	Control1
255	F	3600	3600	Red dish	6	1	2023-05-29	0	0	Silent	667	2	Silent2	2	Control2
255	F	1.601	4.801	Control	7	2	2023-05-30	1	1	Silent	667	2	Silent2	2	Control2
255	F	3600	3600	Purple egg	8	3	2023-05-31	0	0	Silent	667	2	Silent2	2	Control2
255	F	3600	3600	Glow stick	9	4	2023-06-01	0	0	Silent	667	2	Silent2	2	Control2
255	F	3.05	3.3	Control	10	5	2023-06-02	1	1	Silent	667	2	Silent2	2	Control2
258	F	3600	3600	Felt star	6	1	2023-05-29	0	0	Silent	667	2	Silent2	2	Control2
258	F	0.875	3.675	Control	7	2	2023-05-30	1	1	Silent	667	2	Silent2	2	Control2
258	F	3600	3600	Jinglebells	8	3	2023-05-31	0	0	Silent	667	2	Silent2	2	Control2
258	F	3600	3600	Pink puffs	9	4	2023-06-01	0	0	Silent	667	2	Silent2	2	Control2
258	F	1.725	1.975	Control	10	5	2023-06-02	1	1	Silent	667	2	Silent2	2	Control2
263	M	193.738	1129.08	Cover	6	1	2023-05-29	1	1	Silent	667	2	Silent2	2	Control2
263	M	330.535	369.837	Purple egg	7	2	2023-05-30	1	1	Silent	667	2	Silent2	2	Control2
263	M	542.937	550.061	Glow stick	8	3	2023-05-31	1	1	Silent	667	2	Silent2	2	Control2
263	M	5.024	7.274	Control	9	4	2023-06-01	1	1	Silent	667	2	Silent2	2	Control2
263	M	1.051	5.976	Control	10	5	2023-06-02	1	1	Silent	667	2	Silent2	2	Control2
264	F	195.439	197.122	Control	6	1	2023-05-29	1	1	Silent	667	2	Silent2	2	Control2
264	F	3600	3600	Glow stick	7	2	2023-05-30	0	0	Silent	667	2	Silent2	2	Control2
264	F	296.694	299.069	Pipe cleaner	8	3	2023-05-31	1	1	Silent	667	2	Silent2	2	Control2
264	F	22.75	23.75	Control	9	4	2023-06-01	1	1	Silent	667	2	Silent2	2	Control2
264	F	800.979	3522.34	Jinglebells	10	5	2023-06-02	1	1	Silent	667	2	Silent2	2	Control2
265	F	9.854	38.239	Felt star	6	1	2023-05-29	1	1	Silent	667	2	Silent2	2	Control2
265	F	4.378	35.754	Control	7	2	2023-05-30	1	1	Silent	667	2	Silent2	2	Control2
265	F	5.975	6.525	Control	8	3	2023-05-31	1	1	Silent	667	2	Silent2	2	Control2
265	F	403.8	407.949	Pink puffs	9	4	2023-06-01	1	1	Silent	667	2	Silent2	2	Control2
265	F	854.132	1330.8	Jinglebells	10	5	2023-06-02	1	1	Silent	667	2	Silent2	2	Control2
266	F	73.378	75.728	Control	6	1	2023-05-29	1	1	Silent	667	2	Silent2	2	Control2
266	F	399.851	888.872	Cover	7	2	2023-05-30	1	1	Silent	667	2	Silent2	2	Control2
266	F	6.275	32.301	Control	8	3	2023-05-31	1	1	Silent	667	2	Silent2	2	Control2
266	F	408.561	409.614	Red dish	9	4	2023-06-01	1	1	Silent	667	2	Silent2	2	Control2
266	F	129.908	134.083	Felt star	10	5	2023-06-02	1	1	Silent	667	2	Silent2	2	Control2
267	F	188.57	189.768	Control	6	1	2023-05-29	1	1	Silent	667	2	Silent2	2	Control2
267	F	616.969	634.496	Pipe cleaner	7	2	2023-05-30	1	1	Silent	667	2	Silent2	2	Control2
267	F	158.309	160.559	Jinglebells	8	3	2023-05-31	1	1	Silent	667	2	Silent2	2	Control2
267	F	51.153	51.927	Control	9	4	2023-06-01	1	1	Silent	667	2	Silent2	2	Control2
267	F	75.83	78.13	Glow stick	10	5	2023-06-02	1	1	Silent	667	2	Silent2	2	Control2
268	F	1034.95	1041.95	Felt star	6	1	2023-05-29	1	1	Silent	667	2	Silent2	2	Control2
268	F	3600	3600	Cover	7	2	2023-05-30	0	0	Silent	667	2	Silent2	2	Control2
268	F	3160.16	3165.48	Glow stick	8	3	2023-05-31	1	1	Silent	667	2	Silent2	2	Control2
268	F	46.978	47.728	Control	9	4	2023-06-01	1	1	Silent	667	2	Silent2	2	Control2
268	F	98.431	99.457	Control	10	5	2023-06-02	1	1	Silent	667	2	Silent2	2	Control2
269	F	1854.4	2509.76	Pink puffs	6	1	2023-05-29	1	1	Silent	667	2	Silent2	2	Control2
269	F	1.578	6.35	Control	7	2	2023-05-30	1	1	Silent	667	2	Silent2	2	Control2
269	F	3600	3600	Foam fan	8	3	2023-05-31	0	0	Silent	667	2	Silent2	2	Control2
269	F	2.3	2.301	Control	9	4	2023-06-01	1	1	Silent	667	2	Silent2	2	Control2
269	F	3600	3600	Glow stick	10	5	2023-06-02	0	0	Silent	667	2	Silent2	2	Control2
270	M	3007.27	3197	Control	6	1	2023-05-29	1	1	Silent	667	2	Silent2	2	Control2
270	M	3600	3600	Felt star	7	2	2023-05-30	0	0	Silent	667	2	Silent2	2	Control2
270	M	412.55	427.975	Control	8	3	2023-05-31	1	1	Silent	667	2	Silent2	2	Control2
270	M	3600	3600	Foam fan	9	4	2023-06-01	0	0	Silent	667	2	Silent2	2	Control2
270	M	3600	3600	Red dish	10	5	2023-06-02	0	0	Silent	667	2	Silent2	2	Control2
272	F	3600	3600	Glow stick	6	1	2023-05-29	0	0	Silent	667	2	Silent2	2	Control2
272	F	3600	3600	Foam fan	7	2	2023-05-30	0	0	Silent	667	2	Silent2	2	Control2
272	F	72.531	76.68	Pipe cleaner	8	3	2023-05-31	1	1	Silent	667	2	Silent2	2	Control2
272	F	43.15	46.999	Control	9	4	2023-06-01	1	1	Silent	667	2	Silent2	2	Control2
272	F	47.979	47.979	Control	10	5	2023-06-02	1	1	Silent	667	2	Silent2	2	Control2
255	F	1.53	4.945	Control	11	1	2023-06-05	1	1	Silent	667	3	Silent3	2	Control3
255	F	1.624	3.951	Control	12	2	2023-06-06	1	1	Silent	667	3	Silent3	2	Control3
255	F	3600	3600	Pink puffs	13	3	2023-06-07	0	0	Silent	667	3	Silent3	2	Control3
255	F	458.707	460.257	Felt star	14	4	2023-06-08	1	1	Silent	667	3	Silent3	2	Control3
255	F	3600	3600	Pipe cleaner	15	5	2023-06-09	0	0	Silent	667	3	Silent3	2	Control3
258	F	3600	3600	Foam fan	11	1	2023-06-05	0	0	Silent	667	3	Silent3	2	Control3
258	F	3600	3600	Glow stick	12	2	2023-06-06	0	0	Silent	667	3	Silent3	2	Control3
258	F	3600	3600	Red dish	13	3	2023-06-07	0	0	Silent	667	3	Silent3	2	Control3
258	F	1.775	2.026	Control	14	4	2023-06-08	1	1	Silent	667	3	Silent3	2	Control3
258	F	0.1	0.12	Control	15	5	2023-06-09	1	1	Silent	667	3	Silent3	2	Control3
263	M	1.573	15.446	Control	11	1	2023-06-05	1	1	Silent	667	3	Silent3	2	Control3
263	M	1.298	10.401	Pipe cleaner	12	2	2023-06-06	1	1	Silent	667	3	Silent3	2	Control3
263	M	176.079	550.653	Jinglebells	13	3	2023-06-07	1	1	Silent	667	3	Silent3	2	Control3
263	M	135.199	137.225	Pink puffs	14	4	2023-06-08	1	1	Silent	667	3	Silent3	2	Control3
263	M	1.825	2.6	Control	15	5	2023-06-09	1	1	Silent	667	3	Silent3	2	Control3
264	F	467.658	470.053	Pink puffs	11	1	2023-06-05	1	1	Silent	667	3	Silent3	2	Control3
264	F	392.675	672.122	Felt star	12	2	2023-06-06	1	1	Silent	667	3	Silent3	2	Control3
264	F	416.729	432.257	Purple egg	13	3	2023-06-07	1	1	Silent	667	3	Silent3	2	Control3
264	F	37.604	38.628	Control	14	4	2023-06-08	1	1	Silent	667	3	Silent3	2	Control3
264	F	19.774	20.525	Control	15	5	2023-06-09	1	1	Silent	667	3	Silent3	2	Control3
265	F	229.938	231.242	Pipe cleaner	11	1	2023-06-05	1	1	Silent	667	3	Silent3	2	Control3
265	F	101.035	104.705	Foam fan	12	2	2023-06-06	1	1	Silent	667	3	Silent3	2	Control3
265	F	6.2	18.775	Control	13	3	2023-06-07	1	1	Silent	667	3	Silent3	2	Control3
265	F	5.725	19.801	Control	14	4	2023-06-08	1	1	Silent	667	3	Silent3	2	Control3
265	F	82.679	97.254	Purple egg	15	5	2023-06-09	1	1	Silent	667	3	Silent3	2	Control3
266	F	81.159	82.757	Control	11	1	2023-06-05	1	1	Silent	667	3	Silent3	2	Control3
266	F	3600	3600	Foam fan	12	2	2023-06-06	0	0	Silent	667	3	Silent3	2	Control3
266	F	78.377	80.206	Control	13	3	2023-06-07	1	1	Silent	667	3	Silent3	2	Control3
266	F	168.411	216.912	Purple egg	14	4	2023-06-08	1	1	Silent	667	3	Silent3	2	Control3
266	F	193.976	197.276	Glow stick	15	5	2023-06-09	1	1	Silent	667	3	Silent3	2	Control3
267	F	215.061	283.271	Cover	11	1	2023-06-05	1	1	Silent	667	3	Silent3	2	Control3
267	F	424.154	436.502	Red dish	12	2	2023-06-06	1	1	Silent	667	3	Silent3	2	Control3
267	F	65.681	67.004	Control	13	3	2023-06-07	1	1	Silent	667	3	Silent3	2	Control3
267	F	184.585	185.86	Felt star	14	4	2023-06-08	1	1	Silent	667	3	Silent3	2	Control3
267	F	35.632	37.956	Control	15	5	2023-06-09	1	1	Silent	667	3	Silent3	2	Control3
268	F	3600	3600	Purple egg	11	1	2023-06-05	0	0	Silent	667	3	Silent3	2	Control3
268	F	21.379	22.677	Control	12	2	2023-06-06	1	1	Silent	667	3	Silent3	2	Control3
268	F	441.703	442.731	Jinglebells	13	3	2023-06-07	1	1	Silent	667	3	Silent3	2	Control3
268	F	2.124	5.474	Control	14	4	2023-06-08	1	1	Silent	667	3	Silent3	2	Control3
268	F	3600	3600	Pink puffs	15	5	2023-06-09	0	0	Silent	667	3	Silent3	2	Control3
269	F	12.95	13.474	Control	11	1	2023-06-05	1	1	Silent	667	3	Silent3	2	Control3
269	F	3600	3600	Cover	12	2	2023-06-06	0	0	Silent	667	3	Silent3	2	Control3
269	F	4.747	8.372	Control	13	3	2023-06-07	1	1	Silent	667	3	Silent3	2	Control3
269	F	3600	3600	Felt star	14	4	2023-06-08	0	0	Silent	667	3	Silent3	2	Control3
269	F	1239.88	1241.21	Red dish	15	5	2023-06-09	1	1	Silent	667	3	Silent3	2	Control3
270	M	3600	3600	Pipe cleaner	11	1	2023-06-05	0	0	Silent	667	3	Silent3	2	Control3
270	M	3600	3600	Jinglebells	12	2	2023-06-06	0	0	Silent	667	3	Silent3	2	Control3
270	M	3600	3600	Glow stick	13	3	2023-06-07	0	0	Silent	667	3	Silent3	2	Control3
270	M	147.285	148.834	Control	14	4	2023-06-08	1	1	Silent	667	3	Silent3	2	Control3
270	M	65.5	229.001	Control	15	5	2023-06-09	1	1	Silent	667	3	Silent3	2	Control3
272	F	78.607	82.531	Control	11	1	2023-06-05	1	1	Silent	667	3	Silent3	2	Control3
272	F	1.048	1.052	Control	12	2	2023-06-06	1	1	Silent	667	3	Silent3	2	Control3
272	F	31.327	35.077	Jinglebells	13	3	2023-06-07	1	1	Silent	667	3	Silent3	2	Control3
272	F	91.305	610.752	Pink puffs	14	4	2023-06-08	1	1	Silent	667	3	Silent3	2	Control3
272	F	322.945	323.97	Felt star	15	5	2023-06-09	1	1	Silent	667	3	Silent3	2	Control3
